# Supplementary material
Source: MDPI journal article supplement (https://www.mdpi.com/1999-4907/13/8/1278)
Supplement: s1 [file s1]

**Table S1.** The studied natural populations of *P.sylvestris* and *P. sibirica* used in ISSR analysis.

| Population                     | Location                                      | Coordinates              |
|--------------------------------|-----------------------------------------------|--------------------------|
| <i>Pinus sylvestris</i> L.     |                                               |                          |
| <i>PS_GN</i>                   | Perm Krai, Gainy's forestry                   | N: 60.3149<br>E: 54.2869 |
| <i>PS_KN</i>                   | Sverdlovsk Oblast, Verkhoturys's forestry     | N: 58.4946<br>E: 59.3745 |
| <i>PS_KR</i>                   | Perm Krai, Karagay's forestry                 | N: 58.3360<br>E: 54.9588 |
| <i>PS_BS</i>                   | Perm Krai, Bolshesosnovsky's forestry         | N: 57.5317<br>E: 54.4178 |
| <i>PS_UK</i>                   | Perm Krai, Perm's forestry                    | N: 57.6816<br>E: 55.4670 |
| <i>PS_AR</i>                   | Chelyabinsk Oblast, Vishnyovogorsk's forestry | N: 55.5942<br>E: 60.3003 |
| <i>Pinus sibirica</i> Du Tour. |                                               |                          |
| <i>PSB_KV</i>                  | Perm Krai, Krasnovishersk's forestry          | N: 60.3571<br>E: 56.7999 |
| <i>PSB_KH</i>                  | Perm Krai, Kochyovo's forestry                | N: 59.5781<br>E: 54.3317 |
| <i>PSB_BG</i>                  | Perm Krai, Gornozavodsk's forestry            | N: 58.9433<br>E: 58.4900 |
| <i>PSB_PR</i>                  | Perm Krai, Kishert's forestry                 | N: 57.3550<br>E: 57.1672 |
| <i>PSB_KG</i>                  | Perm Krai, Chusovoy's forestry                | N: 58.7226<br>E: 57.6331 |
| <i>PSB_KN</i>                  | Sverdlovsk Oblast, Verkhoturys's forestry     | N: 58.7902<br>E: 59.3719 |

International geographical latitude designations: N - northern latitude; E - Eastern longitude

**Table S2.** Pairwise geographic distances (km) between the studied populations of *P. sylvestris*.

| <i>PS_GN</i>                                                              | <i>PS_KN</i> | <i>PS_KR</i> | <i>PS_BS</i> | <i>PS_UK</i> |              |
|---------------------------------------------------------------------------|--------------|--------------|--------------|--------------|--------------|
| 343                                                                       | -            |              |              |              | <i>PS_KN</i> |
| 223                                                                       | 276          | -            |              |              | <i>PS_KR</i> |
| 309                                                                       | 337          | 95           | -            |              | <i>PS_BS</i> |
| 300                                                                       | 274          | 78           | 64           | -            | <i>PS_UK</i> |
| 602                                                                       | 319          | 423          | 408          | 358          | <i>PS_AR</i> |
| <i>PS_GN, PS_KN, PS_KR, PS_BS, PS_UK, PS_AR</i> - population designations |              |              |              |              |              |

**Table S3.** Pairwise geographic distances (km) between the studied populations of *P. sibirica*.

| <i>PSB_KV</i>                                                                   | <i>PSB_KH</i> | <i>PSB_BG</i> | <i>PSB_PR</i> | <i>PSB_KG</i> |               |
|---------------------------------------------------------------------------------|---------------|---------------|---------------|---------------|---------------|
| 147                                                                             | -             |               |               |               | <i>PSB_KH</i> |
| 232                                                                             | 181           | -             |               |               | <i>PSB_BG</i> |
| 192                                                                             | 318           | 294           | -             |               | <i>PSB_PR</i> |
| 54                                                                              | 164           | 199           | 154           | -             | <i>PSB_KG</i> |
| 53                                                                              | 182           | 285           | 206           | 100           | <i>PSB_KN</i> |
| <i>PSB_KV, PSB_KH, PSB_BG, PSB_PR, PSB_KG, PSB_KN</i> - population designations |               |               |               |               |               |

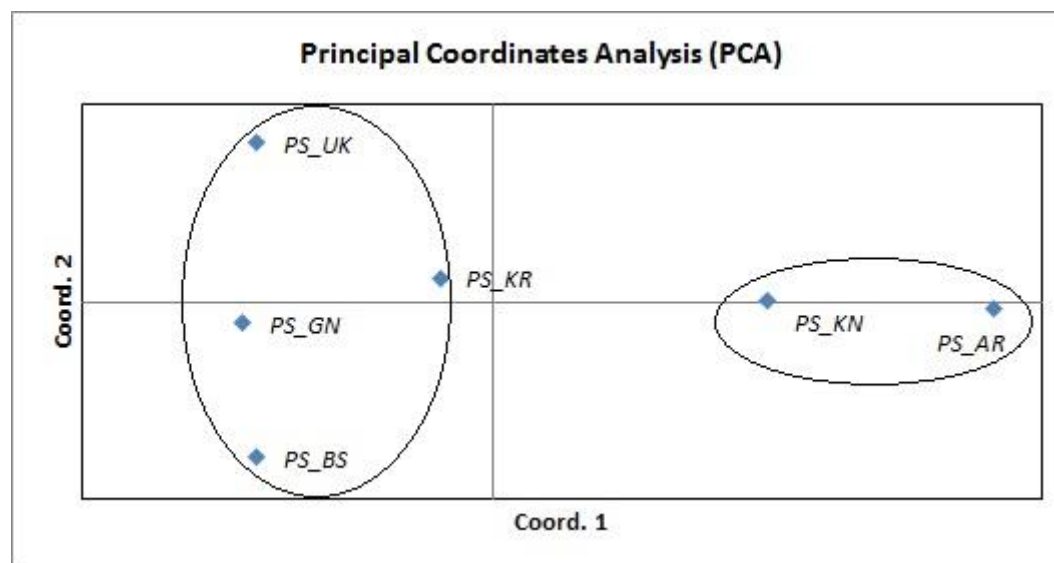

**Figure S1.** Ordination of the studied populations of *P. sylvestris* using PCA, obtained on the basis of PhiPT matrix of genetic distances.

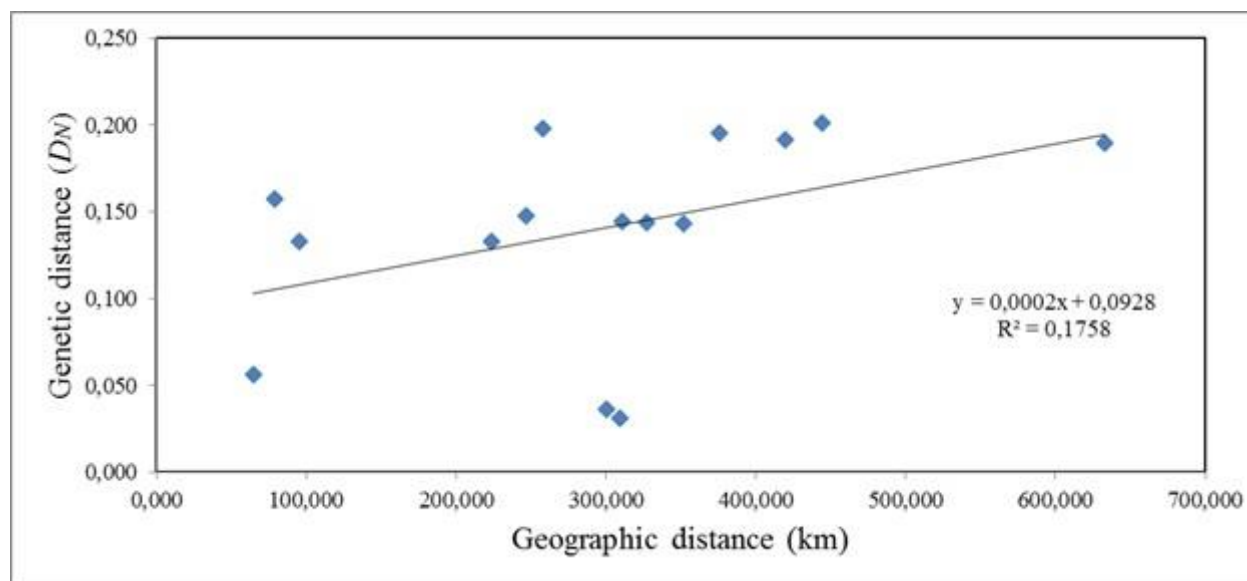

**Figure S2.** Graph of dependence of genetic ( $D_N$ ) and geographical distances of *P. sylvestris* populations.

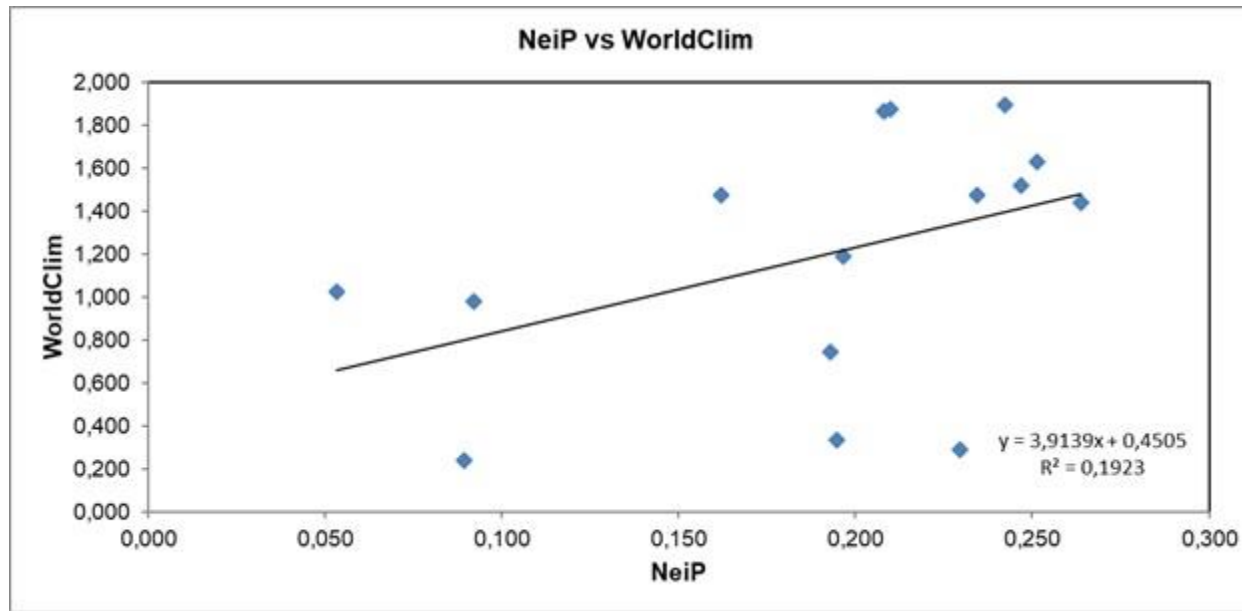

**Figure S3.** Mantel test for the WorldClim data and genetics distance of *P. sylvestris*.

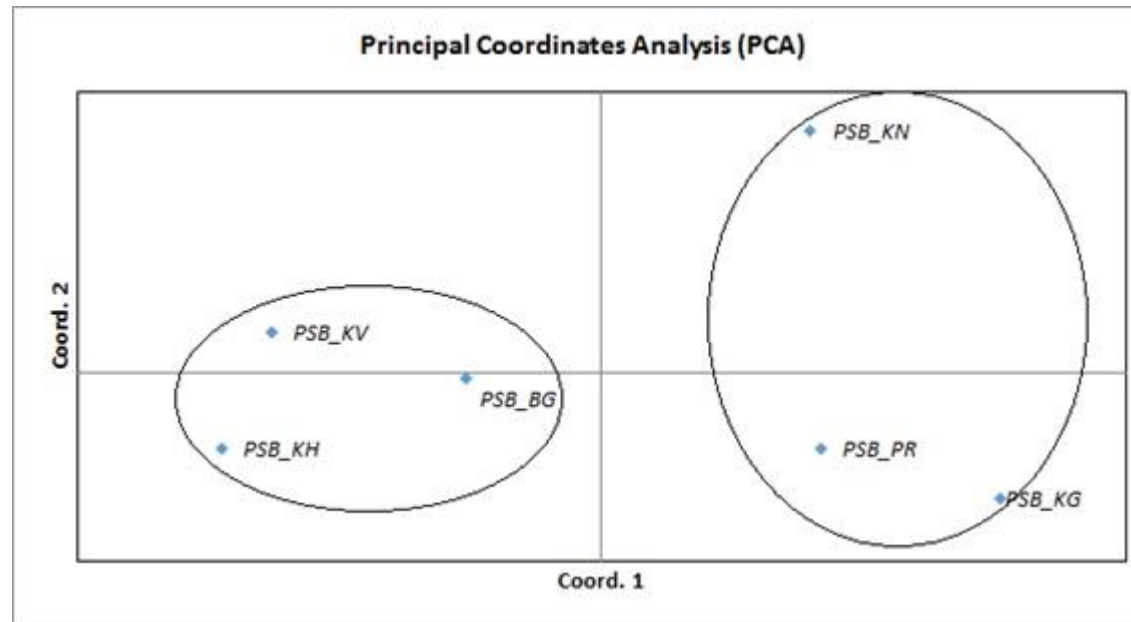

**Figure S4.** Ordination of the studied populations of *P. sylvestris* using PCA, obtained on the basis of PhiPT matrix of genetic distances.

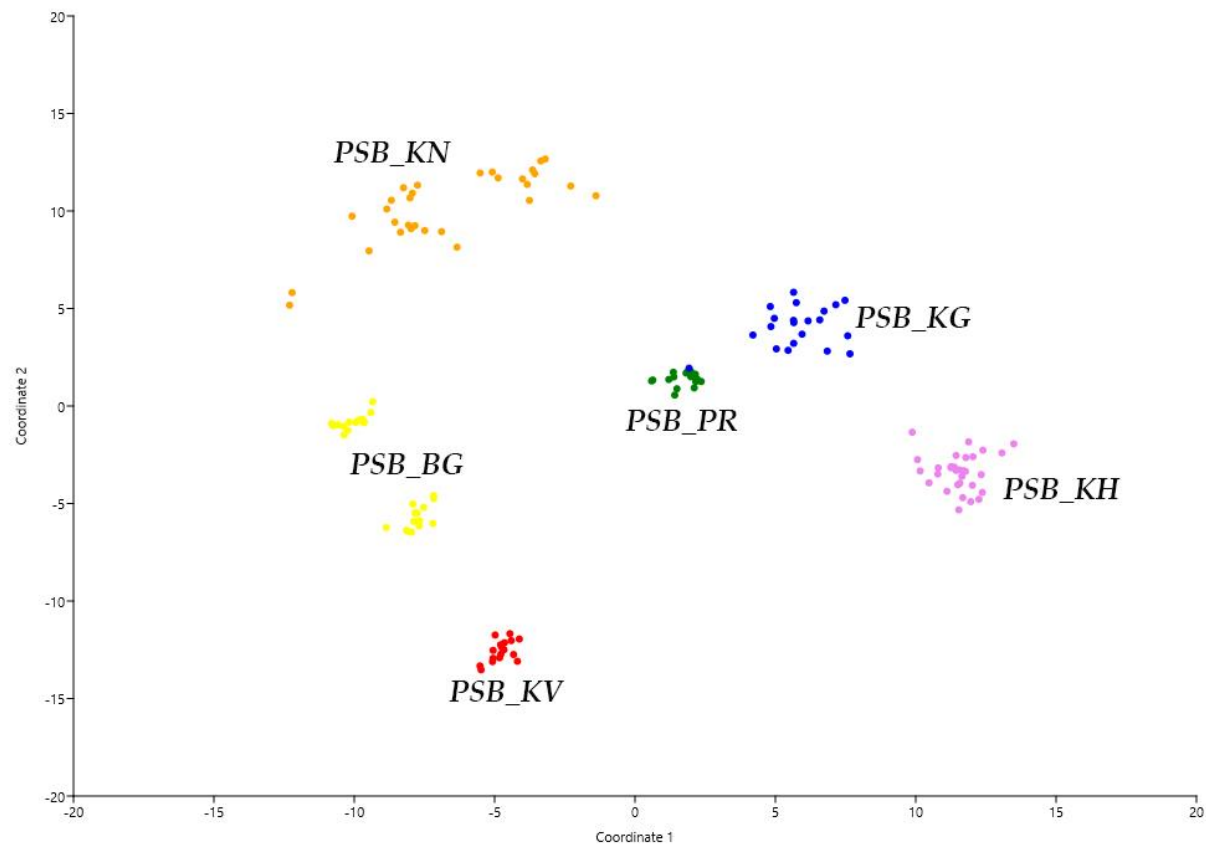

**Figure S5.** Distribution of individuals in the studied *Pinus sibirica* Du Tour. populations using UMAP. Population color labels: *PSB\_KV* - red, *PSB\_KN* - orange, *PSB\_BG* - yellow, *PSB\_PR* - green, *PSB\_KG* - blue, *PSB\_KH* - violet.

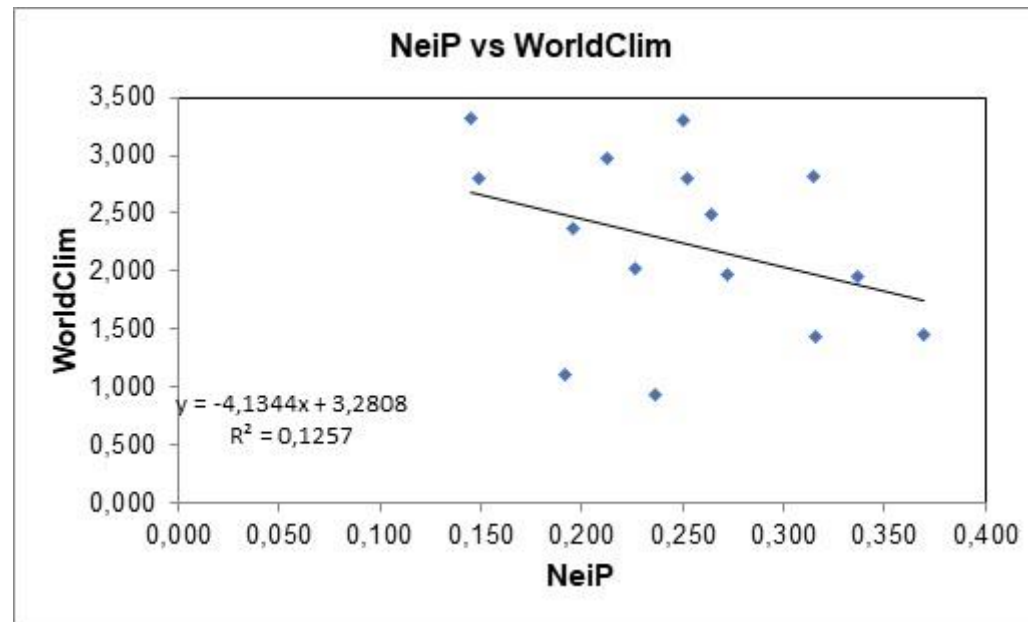

**Figure S6.** Mantel test for the WorldClim data and genetics distance of *P. sibirica*.



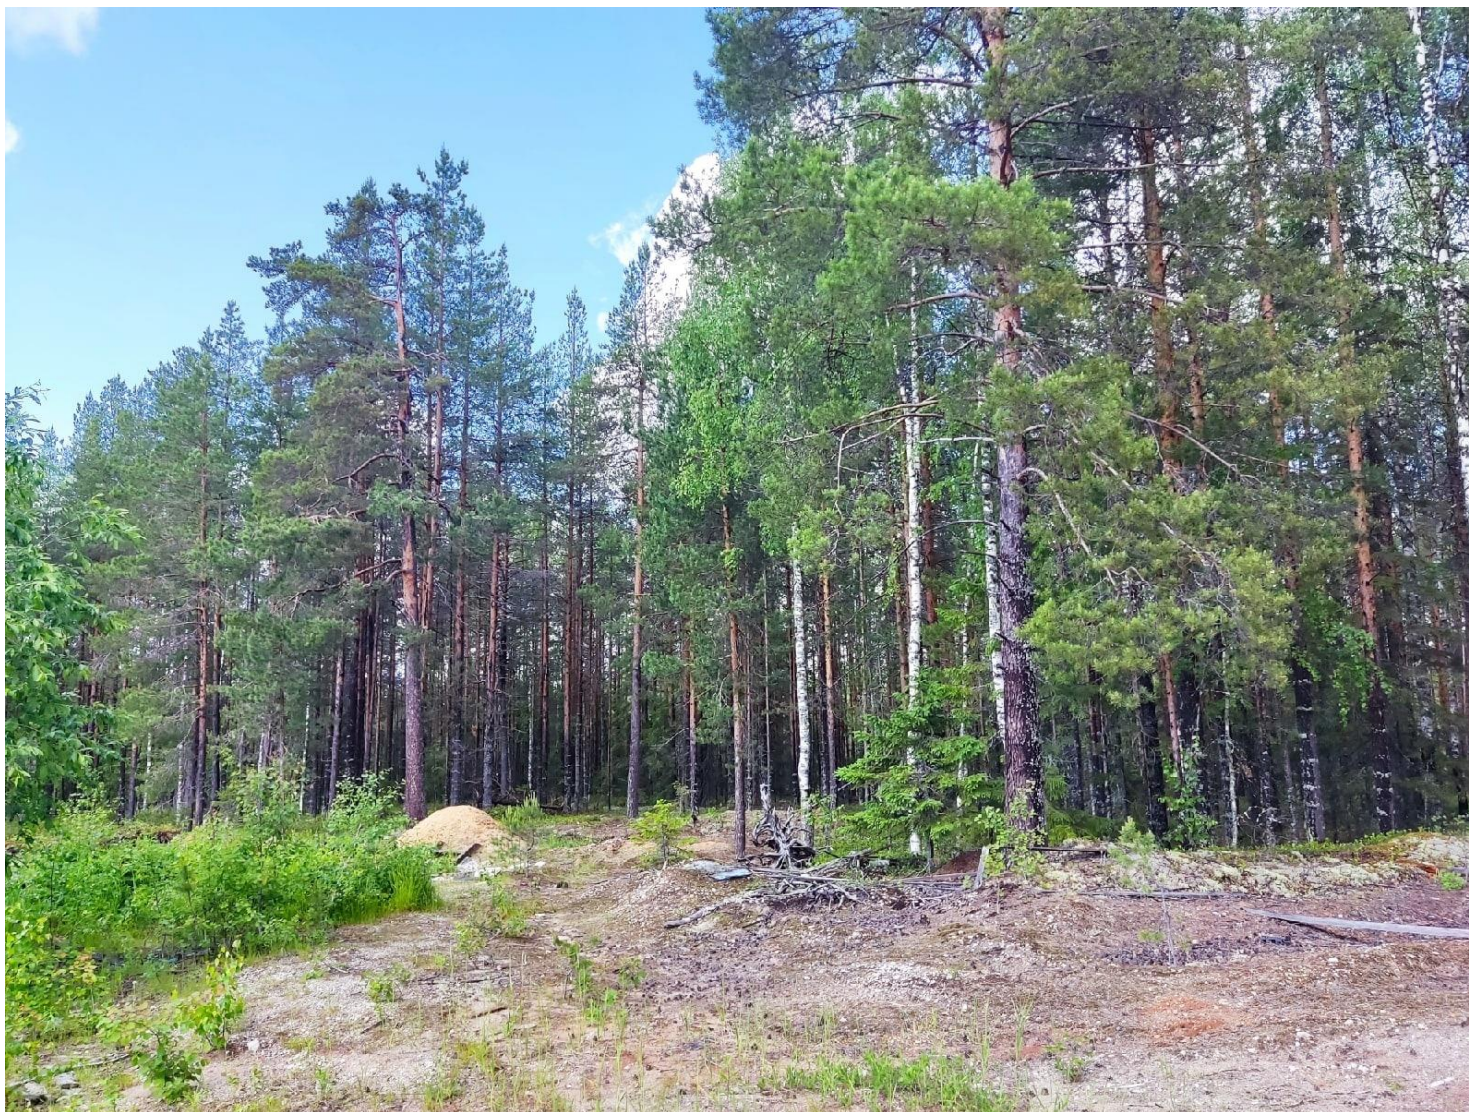

**Figure S7.** *Pinus sylvestris* L., Perm Krai, Gainy's forestry population.



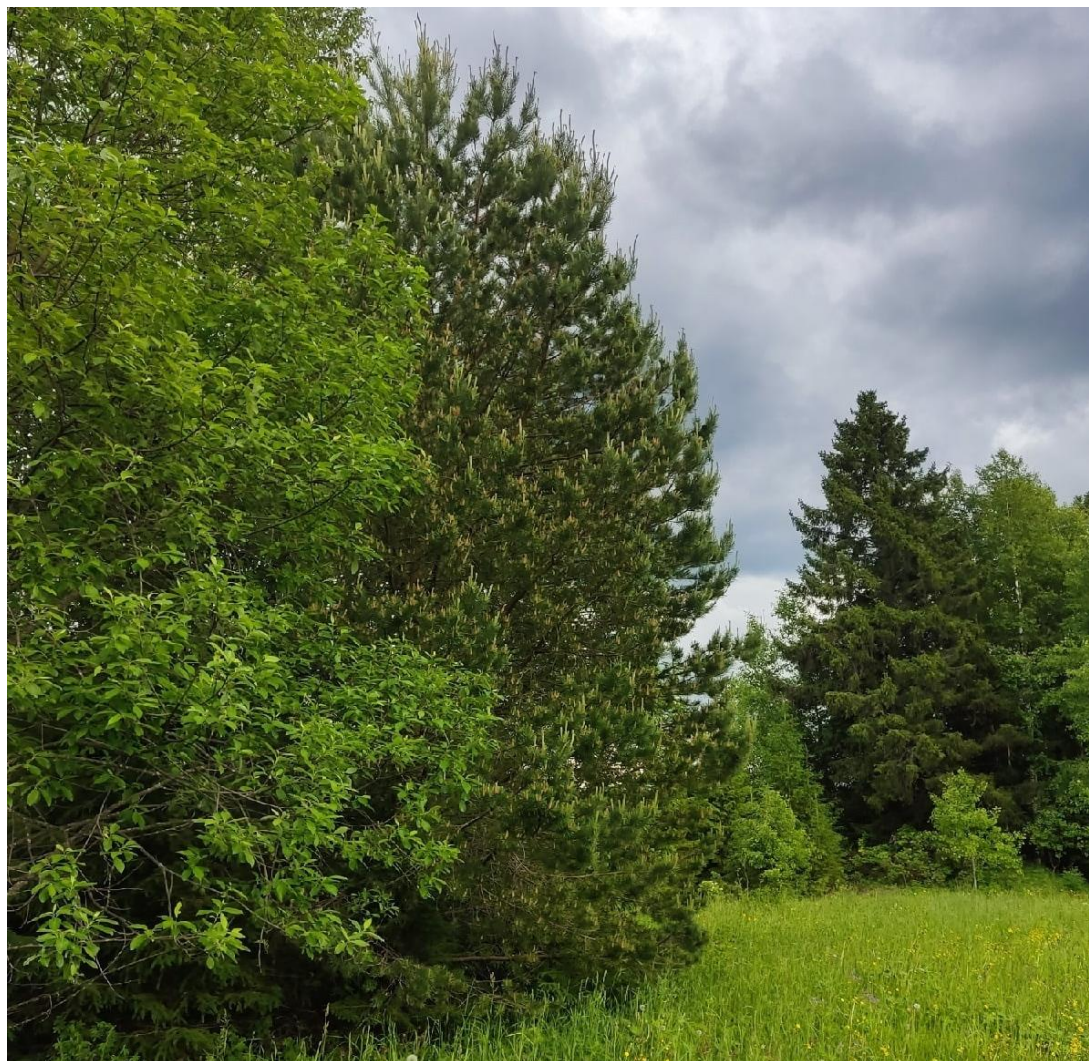

**Figure S8.** *Pinus sylvestris* L., Perm Krai, Karagay's forestry population.



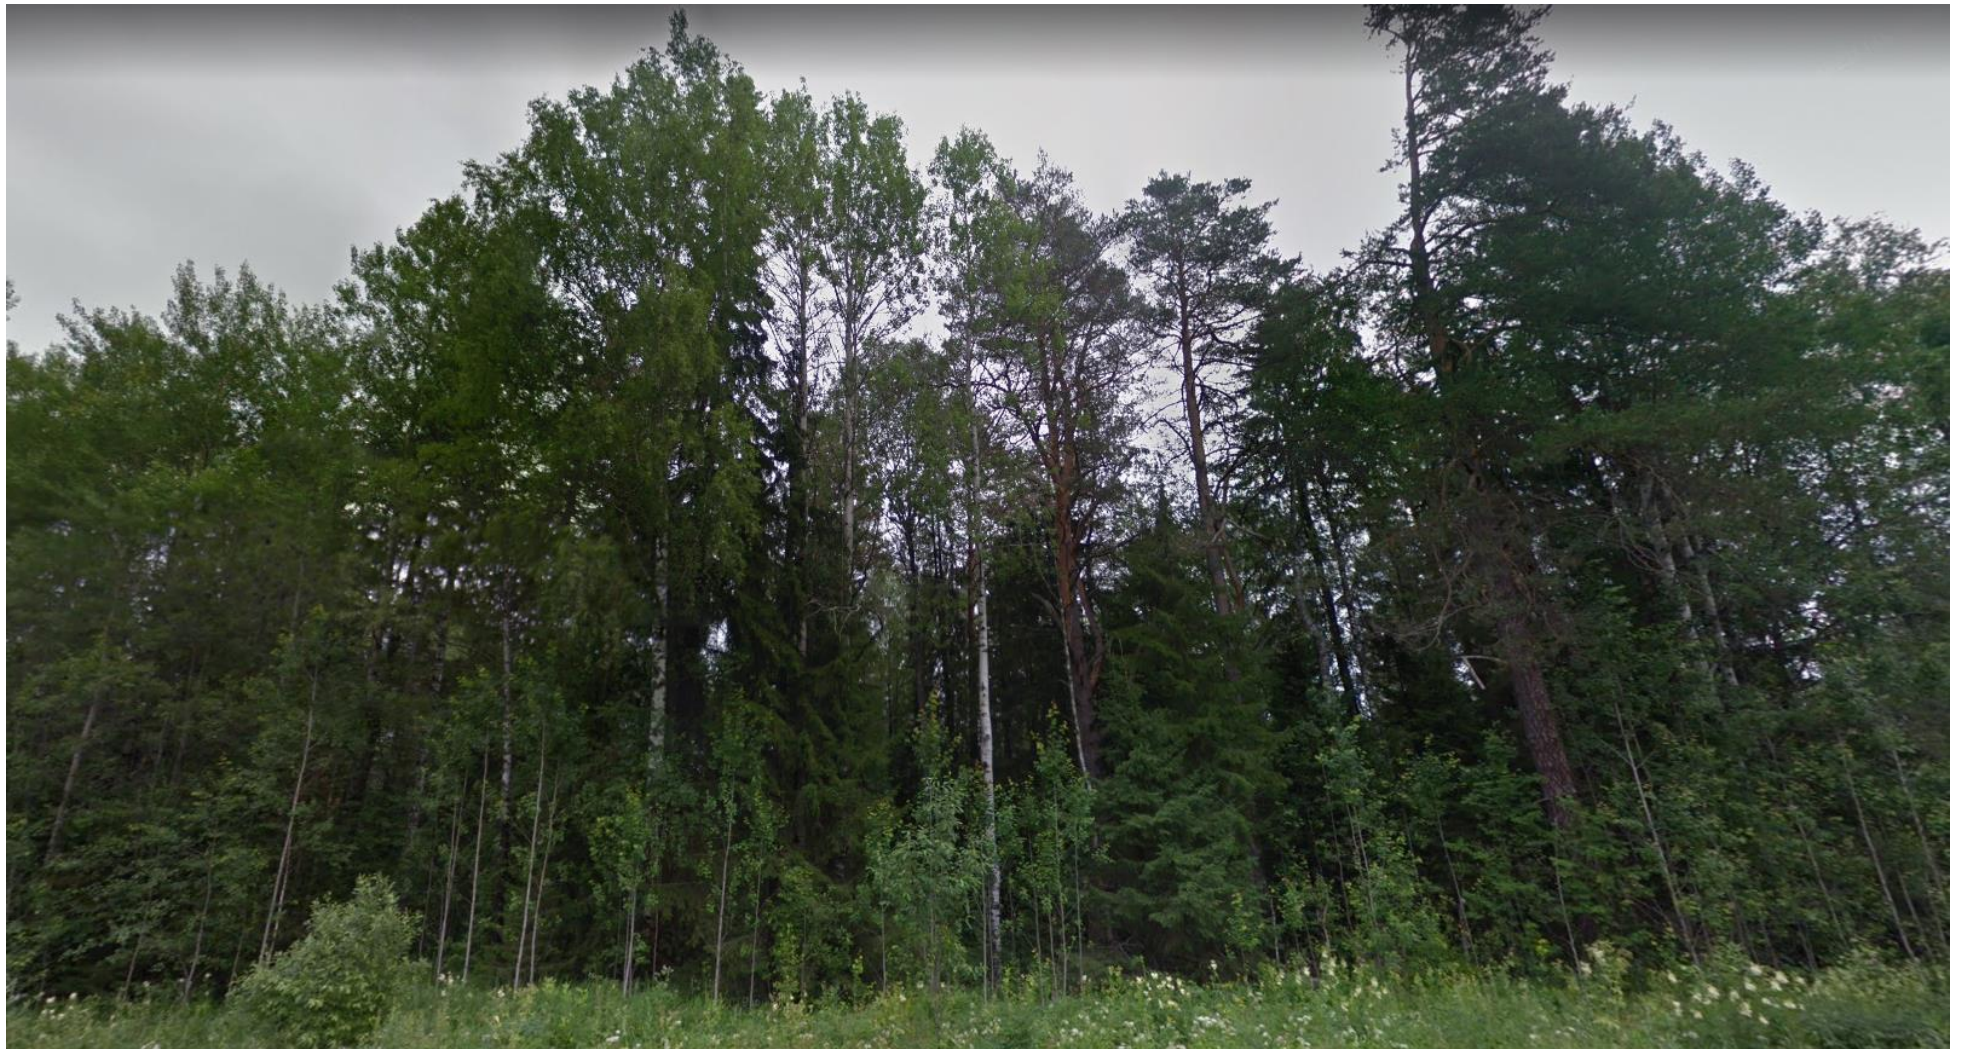

**Figure S9.** *Pinus sylvestris* L., Perm Krai, Perm's forestry population.



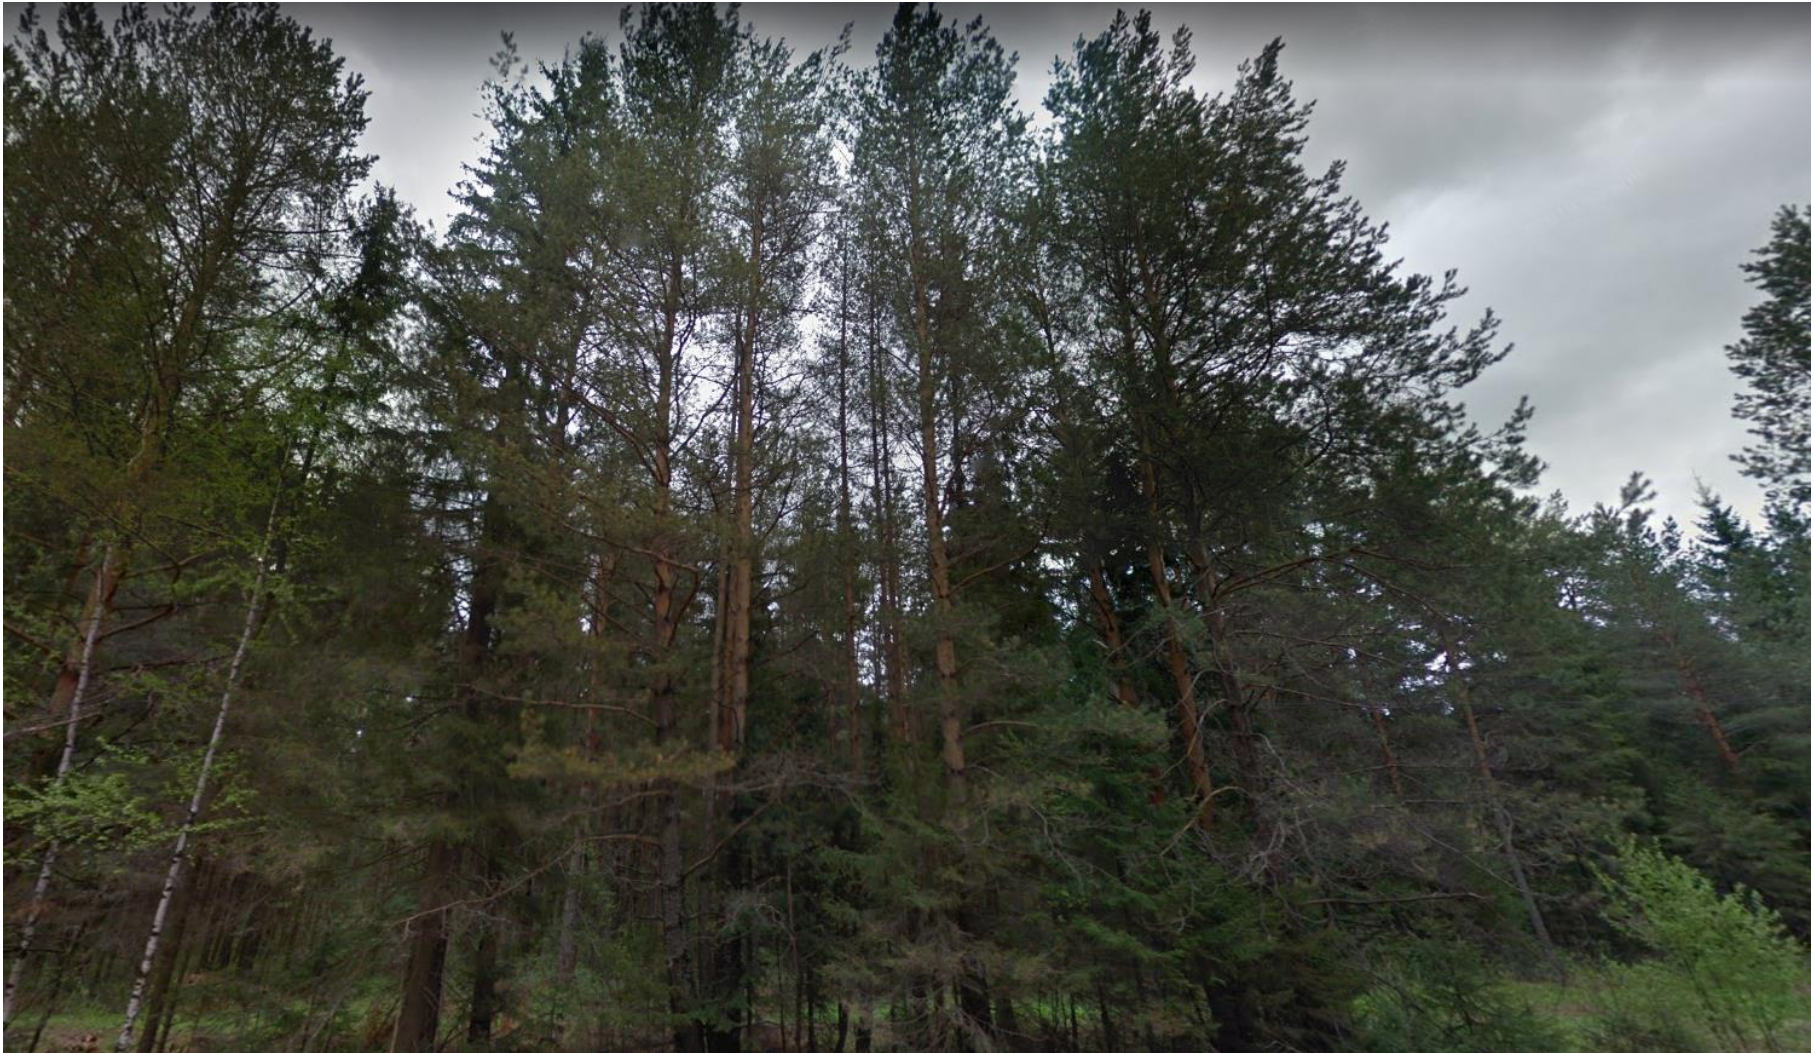

**Figure S10.** *Pinus sylvestris* L., Perm Krai, Bolshesosnovsky's forestry population.



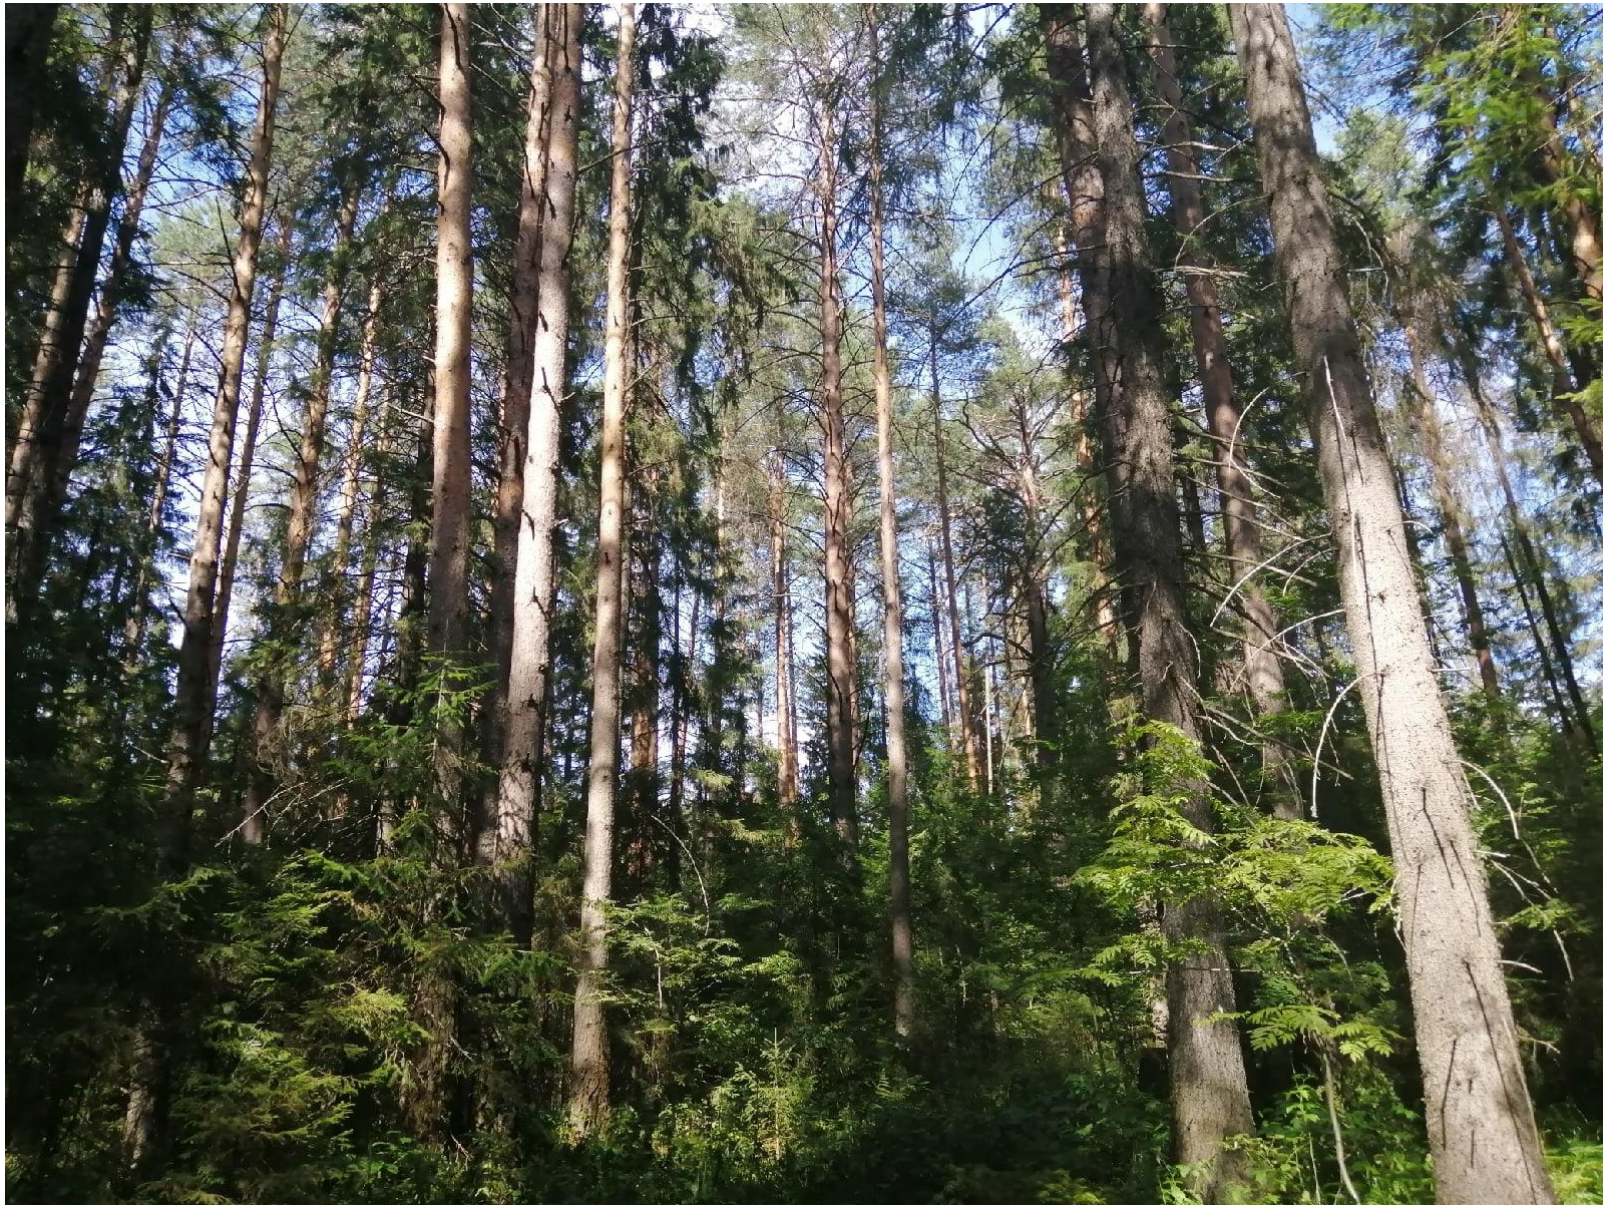

**Figure S11.** *Pinus sylvestris* L., Sverdlovsk Oblast, Verkhoturys' forestry population.



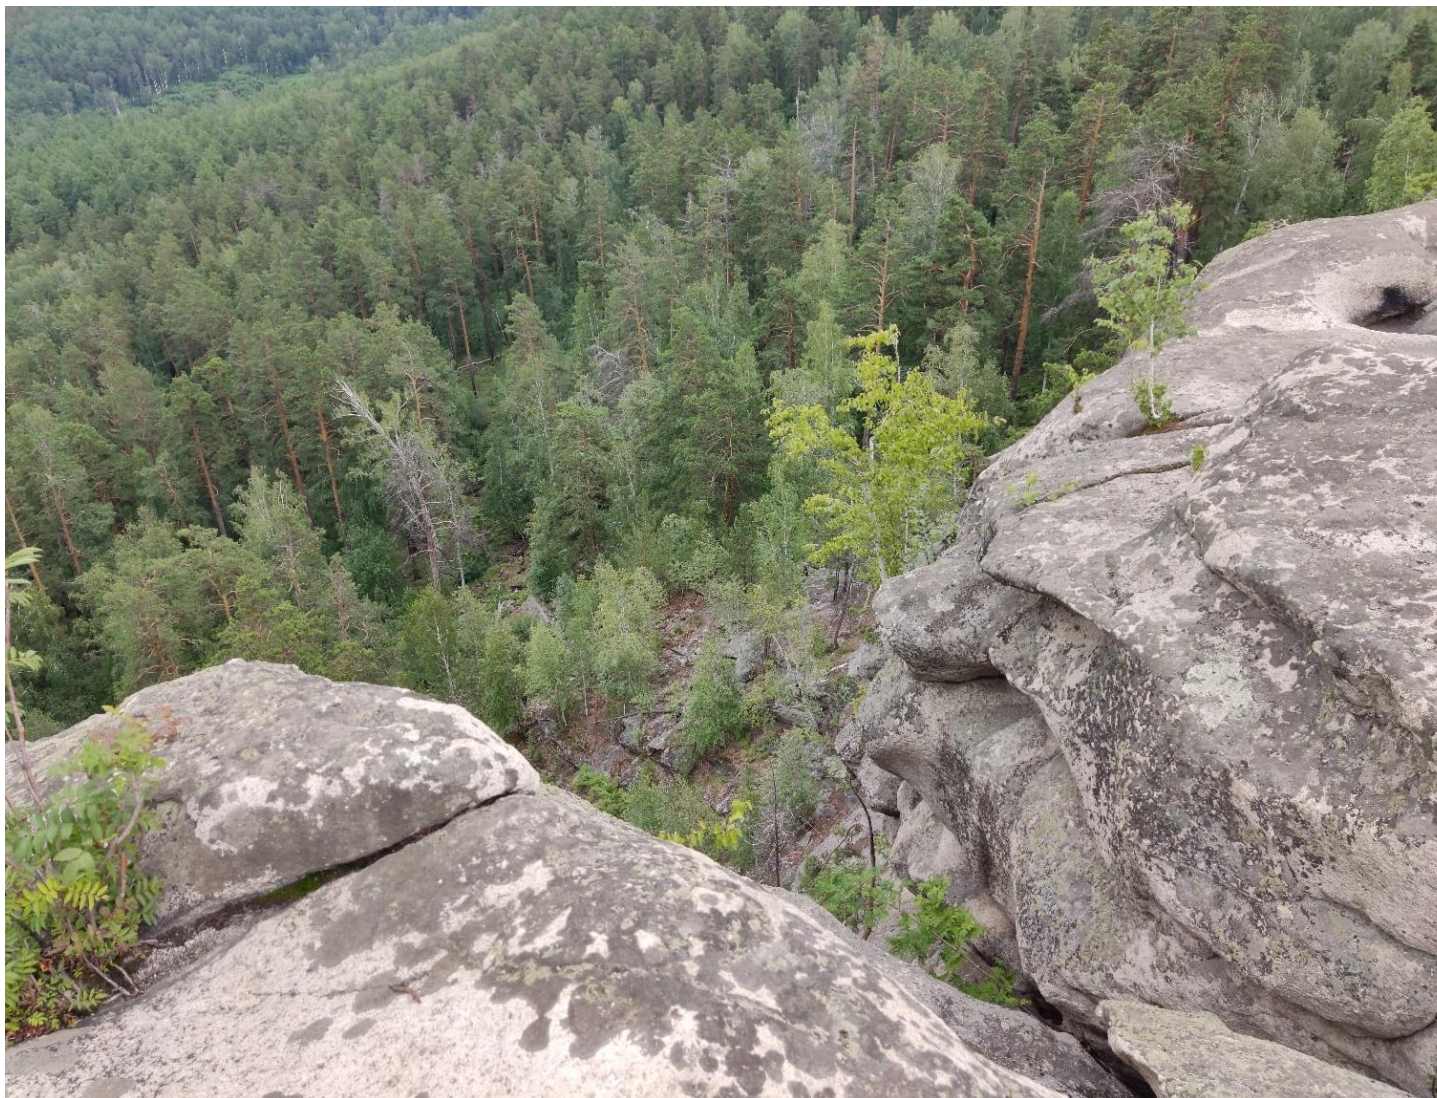

**Figure S12.** *Pinus sylvestris* L., Chelyabinsk Oblast, Vishnyovogorsk's forestry population.



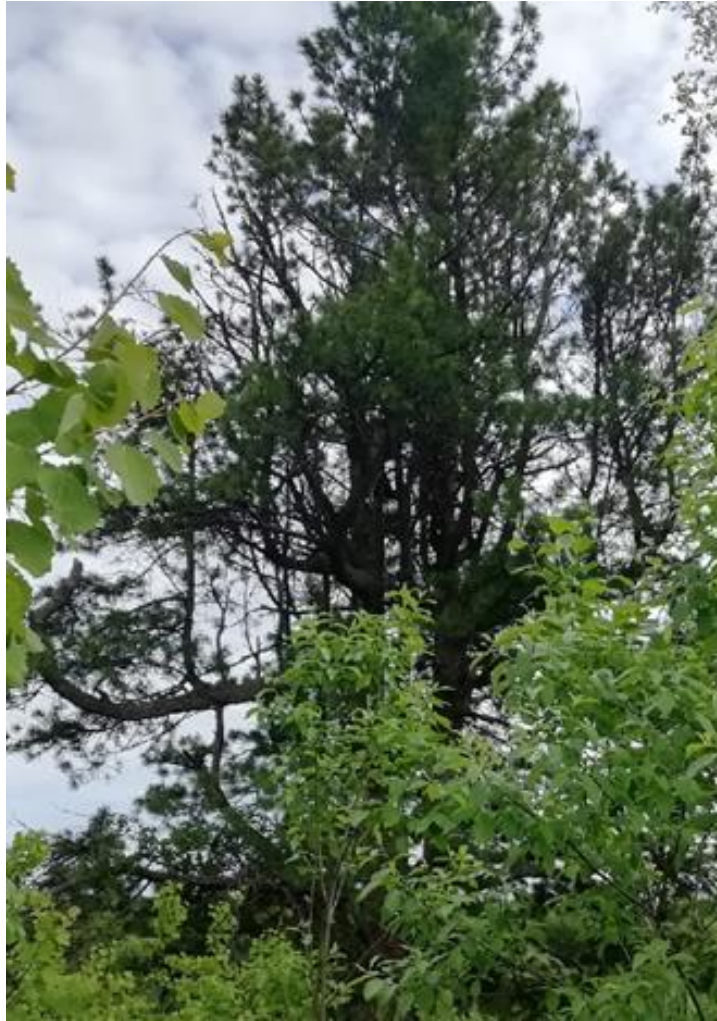

**Figure S13.** *Pinus sibirica* Du Tour, Perm Krai, Krasnovishersk's forestry forestry population.



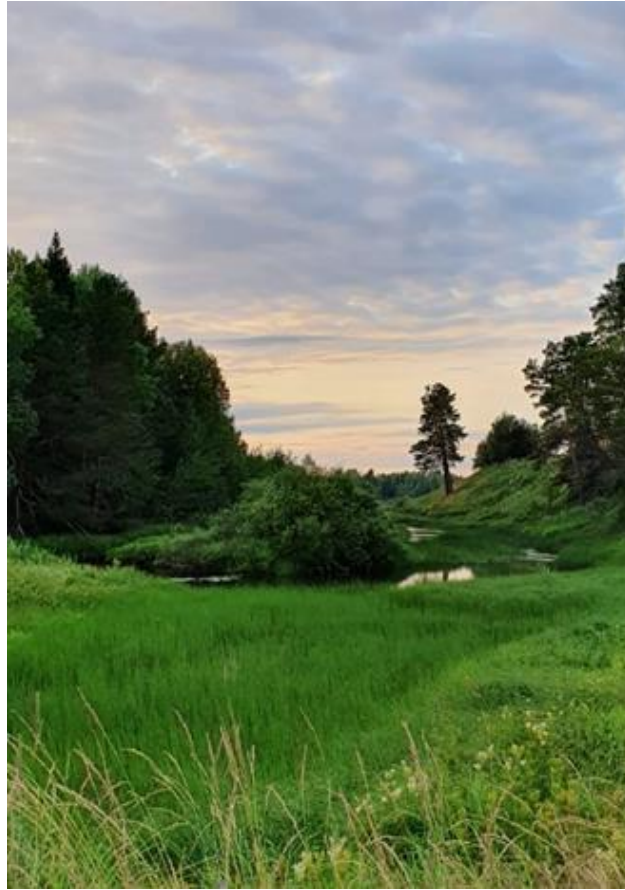

**Figure S14.** *Pinus sibirica* Du Tour, Perm Krai, Kochyovo's forestry population.

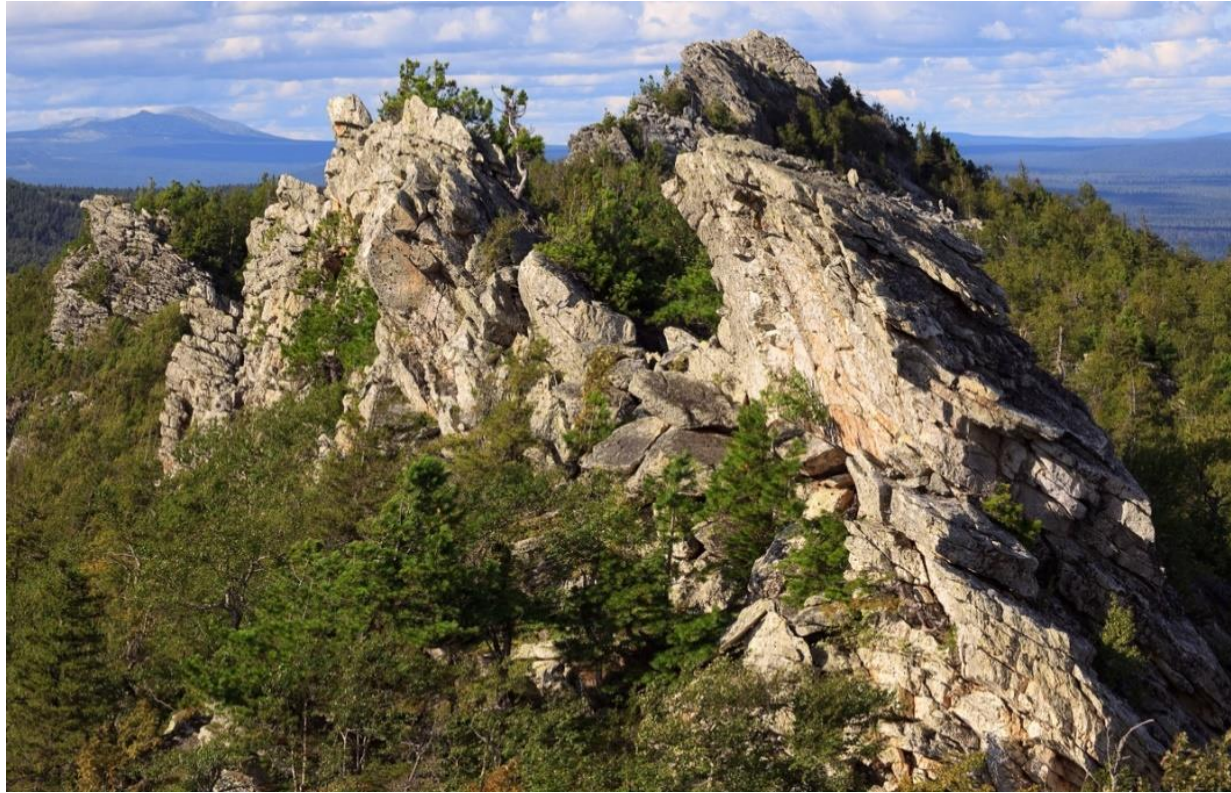

**Figure S15.** *Pinus sibirica* Du Tour, Perm Krai, Gornozavodsk's forestry population.

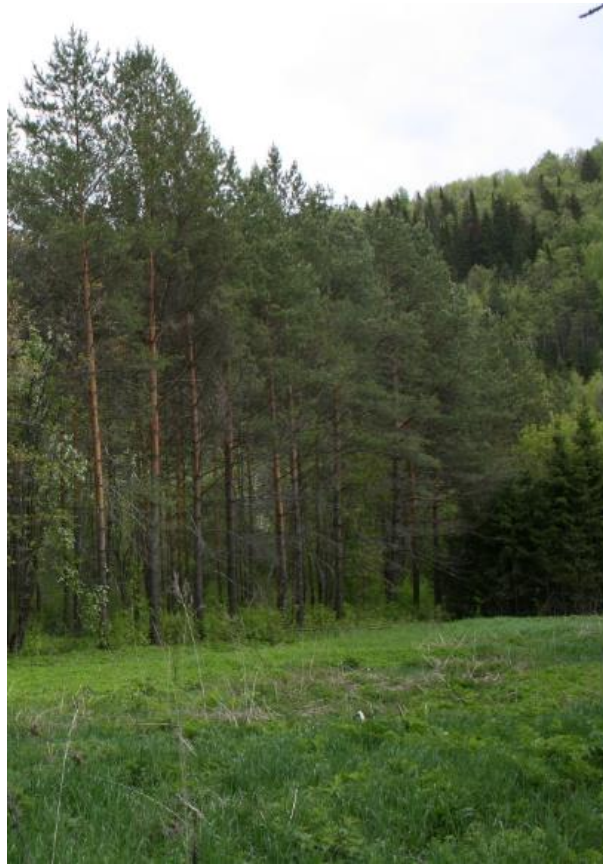

**Figure S16.** *Pinus sibirica* Du Tour, Perm Krai, Kishert's forestry population.



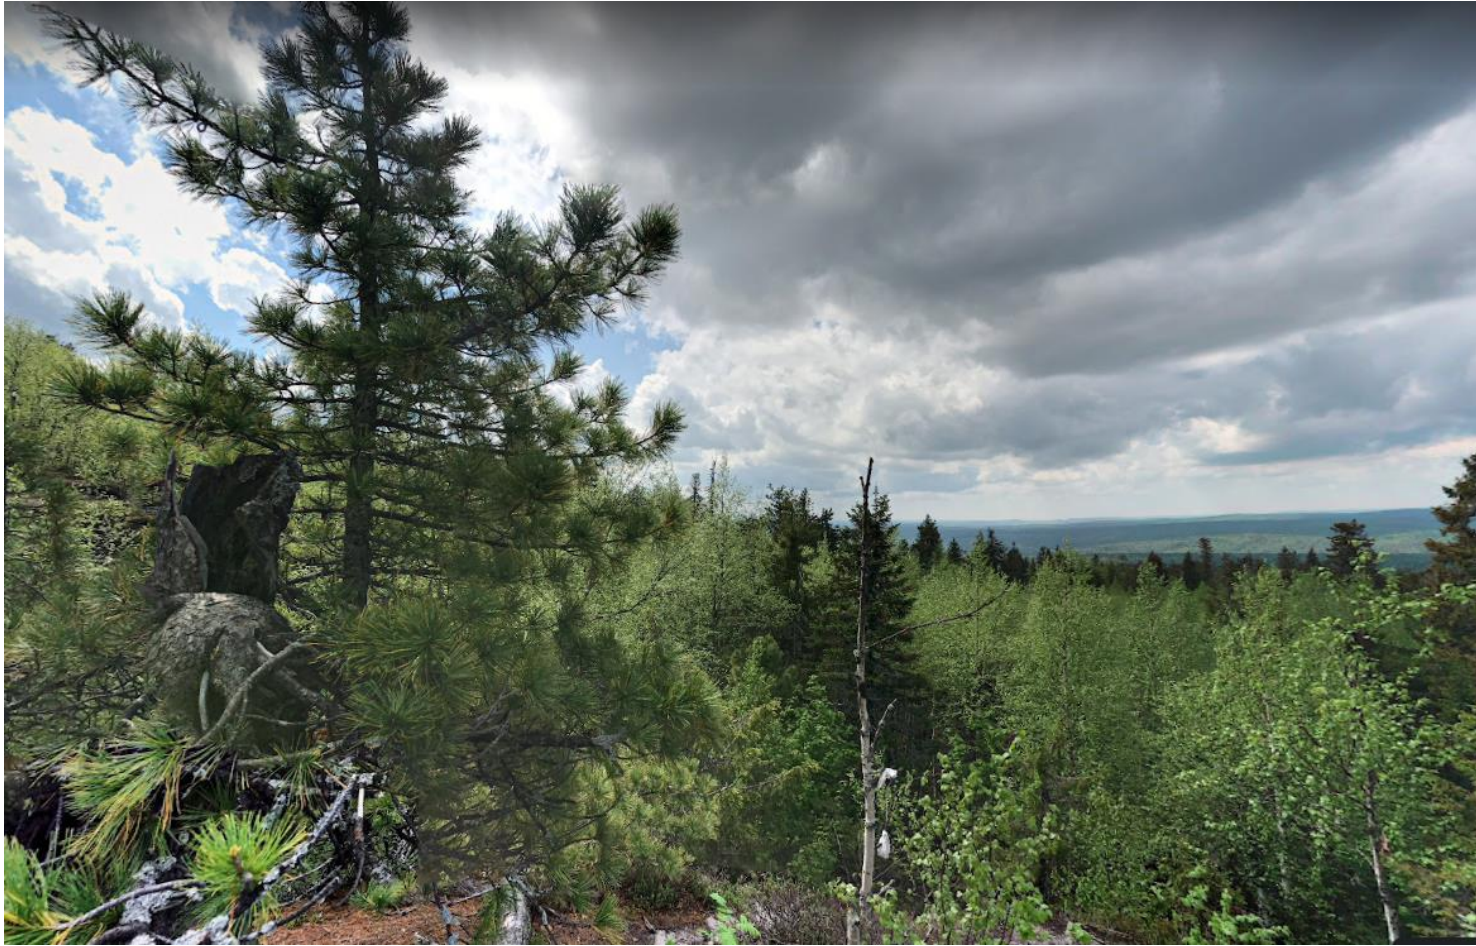

**Figure S17.** *Pinus sibirica* Du Tour, Perm Krai, Chusovoy's forestry population.

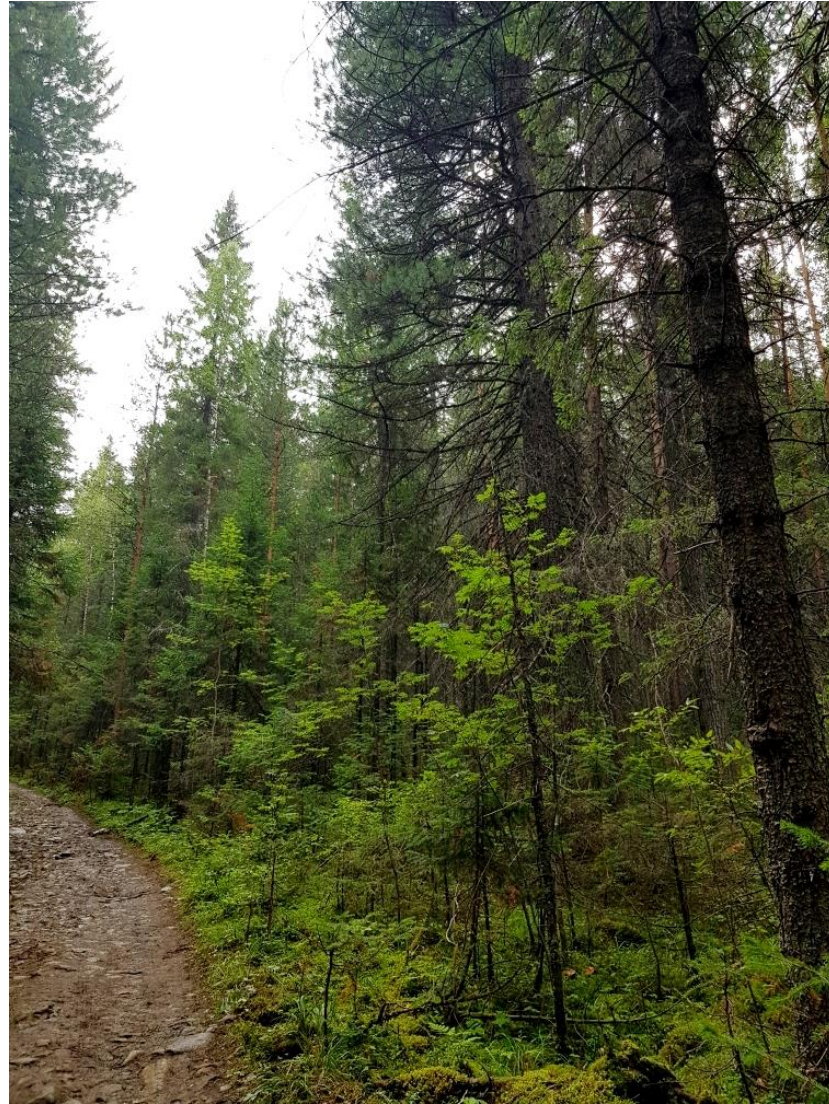

**Figure S18.** *Pinus sibirica* Du Tour, Sverdlovsk Oblast, Verkhoturys's forestry population.



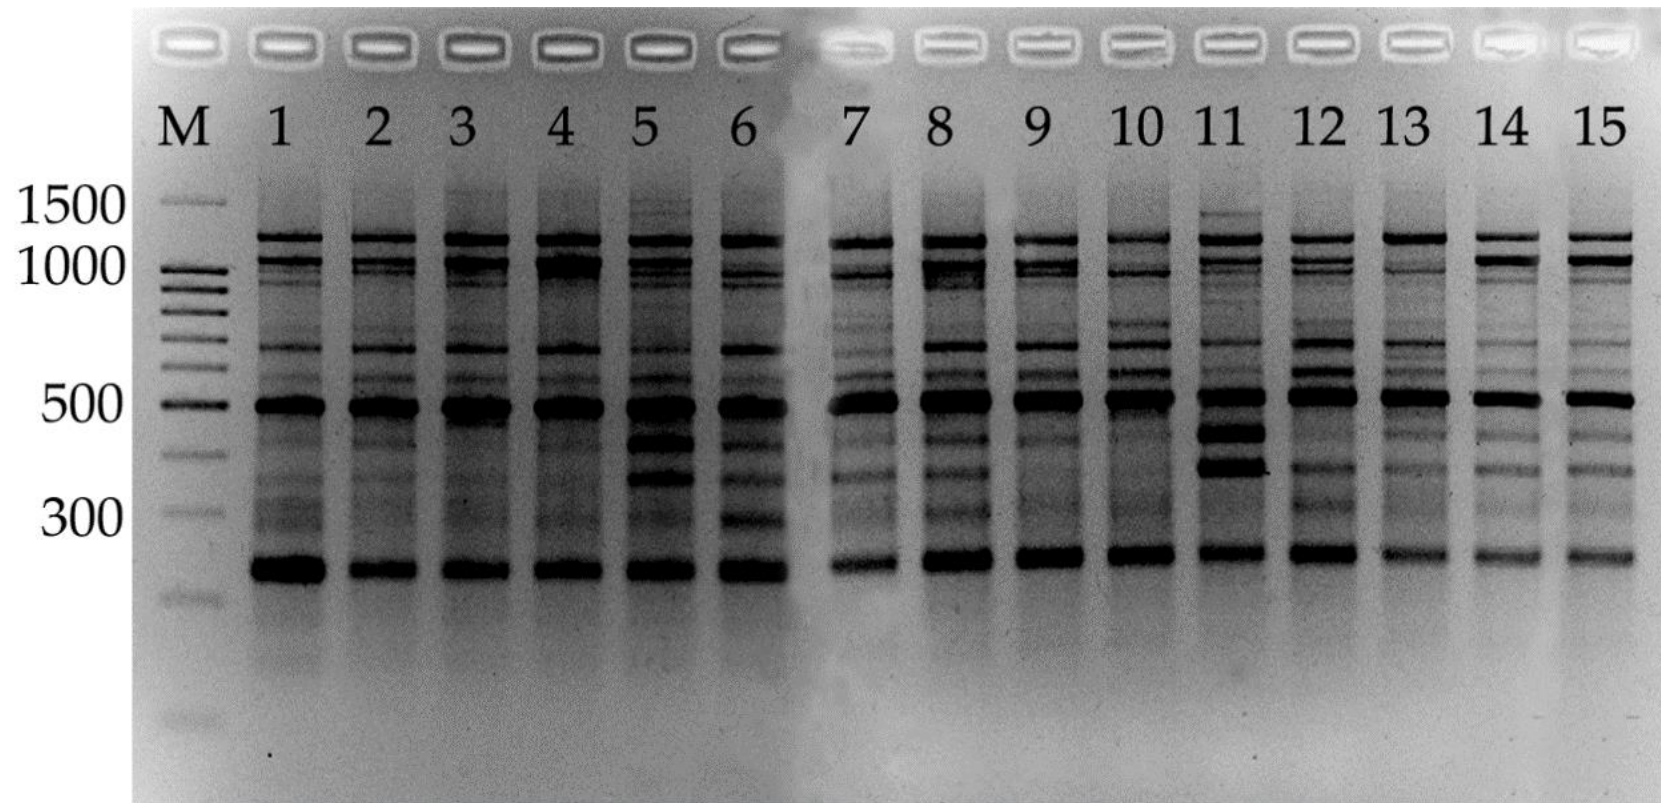

**Figure S19.** The band profiles with ISSR primer X11 (AGC)<sub>6</sub>G for the samples of *P. sibirica* from the population of Gornozavodsk's forestry (*PSB\_BG*). The numbers on the top indicate the sample numbers (1-15). Size marker (M): 100 bp DNA Ladder, marked on the left in bp (300 bp to 1500 bp).



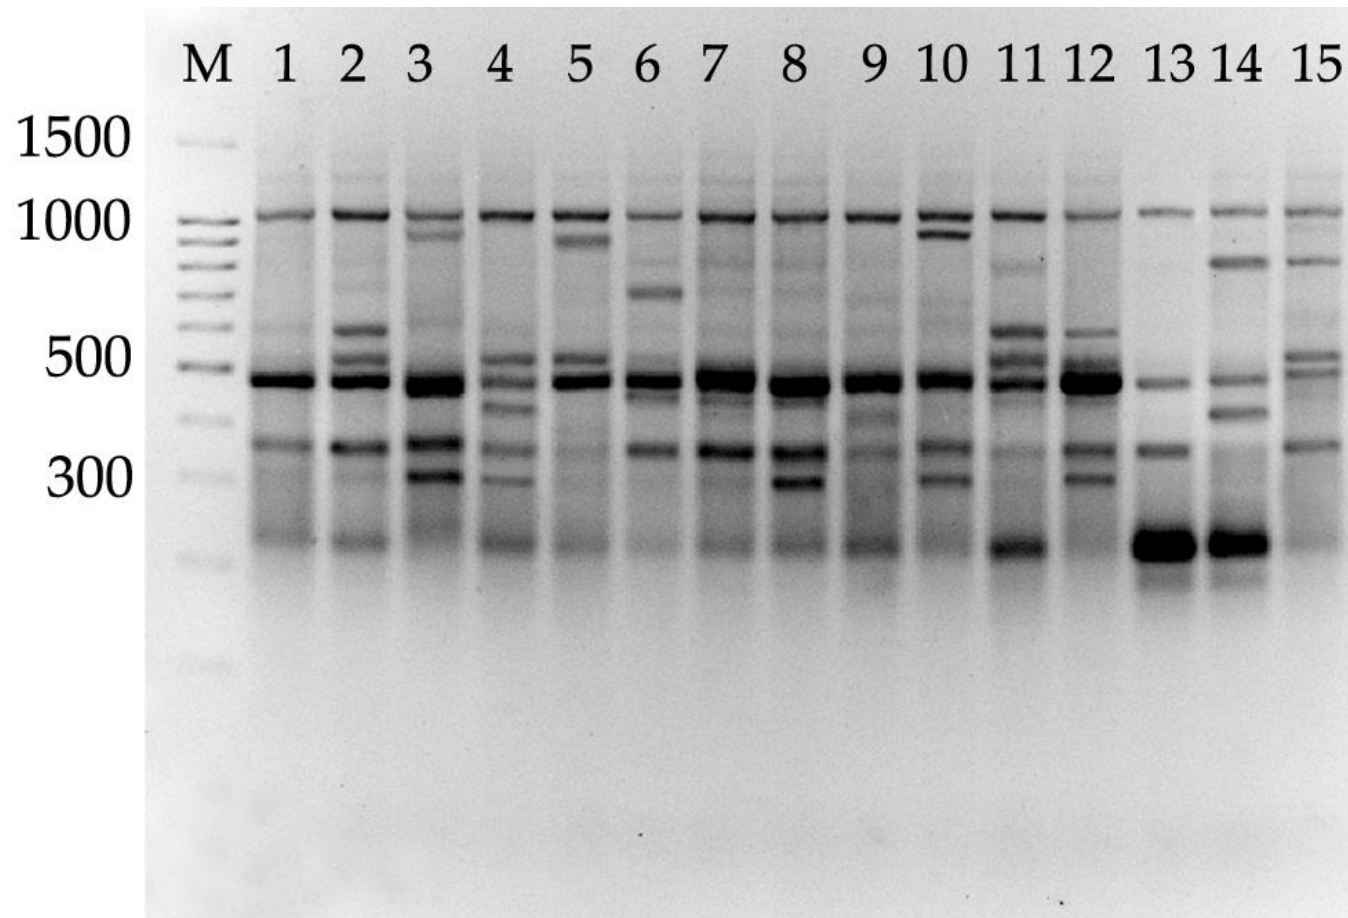

**Figure S20.** The band profiles with ISSR primer ISSR-9 ((ACG)<sub>7</sub>G) for the samples of *P. sibirica* from the population of Kochyovo's forestry (*PSB\_KH*). The numbers on the top indicate the sample numbers (1-15). Size marker (M): 100 bp DNA Ladder, marked on the left in bp (300 bp to 1500 bp).

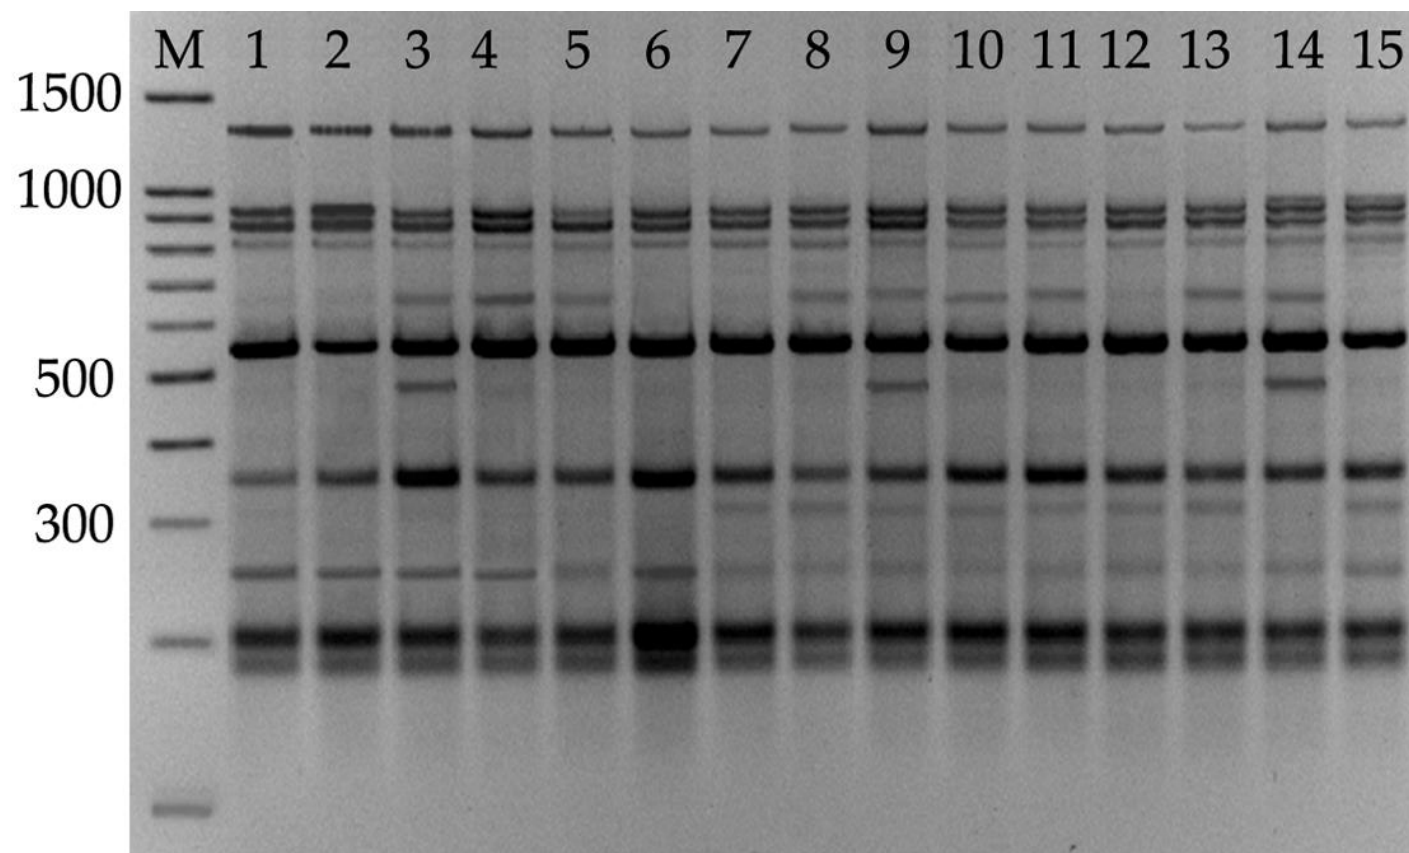

**Figure S21.** The band profiles with ISSR primer M1 ((AC)<sub>8</sub>CG) for the samples of *P. sibirica* from the population of Gornozavodsk's forestry (*PSB\_BG*). The numbers on the top indicate the sample numbers (1-15). Size marker (M): 100 bp DNA Ladder, marked on the left in bp (300 bp to 1500 bp).

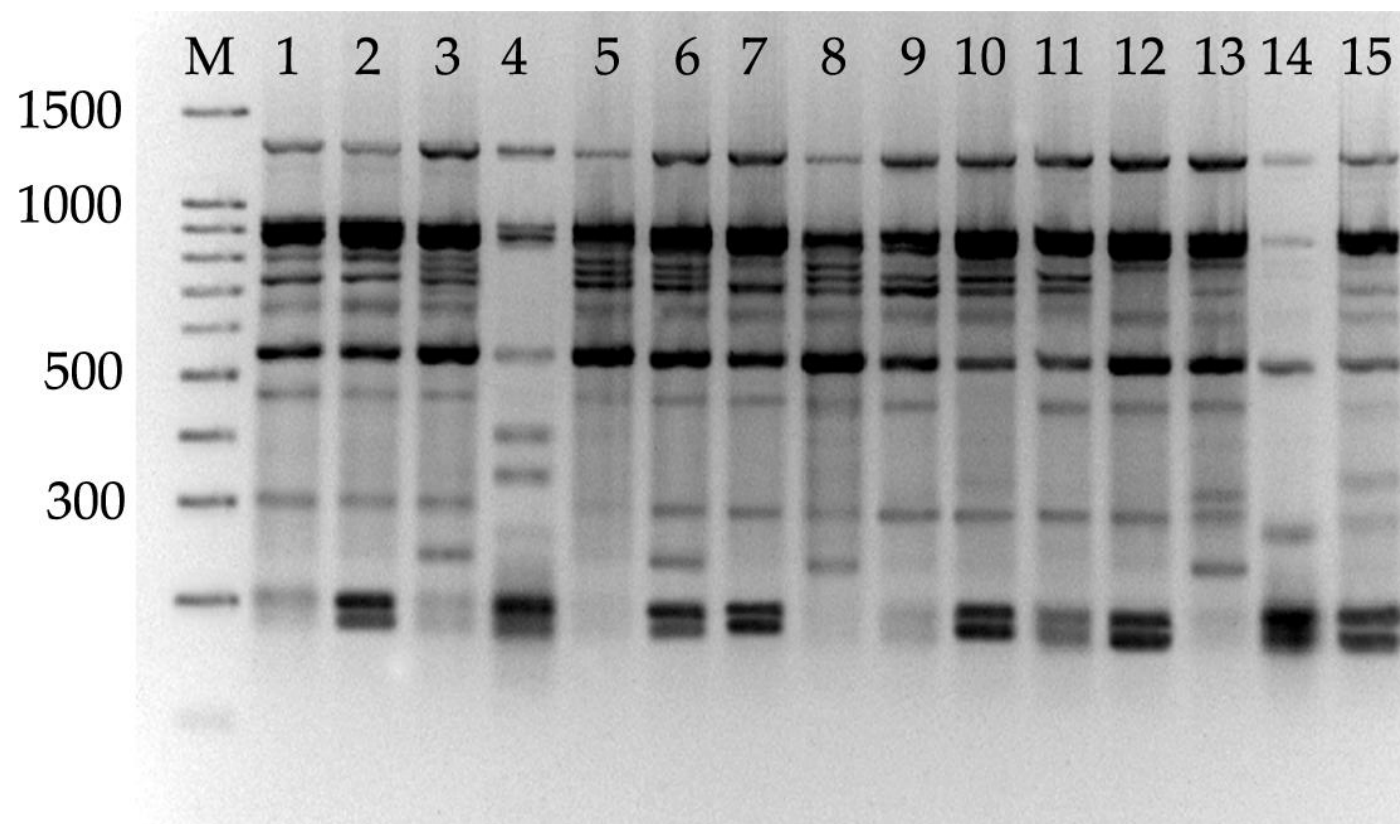

**Figure S22.** The band profiles with ISSR primer M1 ((AC)<sub>8</sub>CG) for the samples of *P. sibirica* from the population of Kochyovo's forestry (*PSB\_KH*). The numbers on the top indicate the sample numbers (1-15). Size marker (M): 100 bp DNA Ladder, marked on the left in bp (300 bp to 1500 bp).

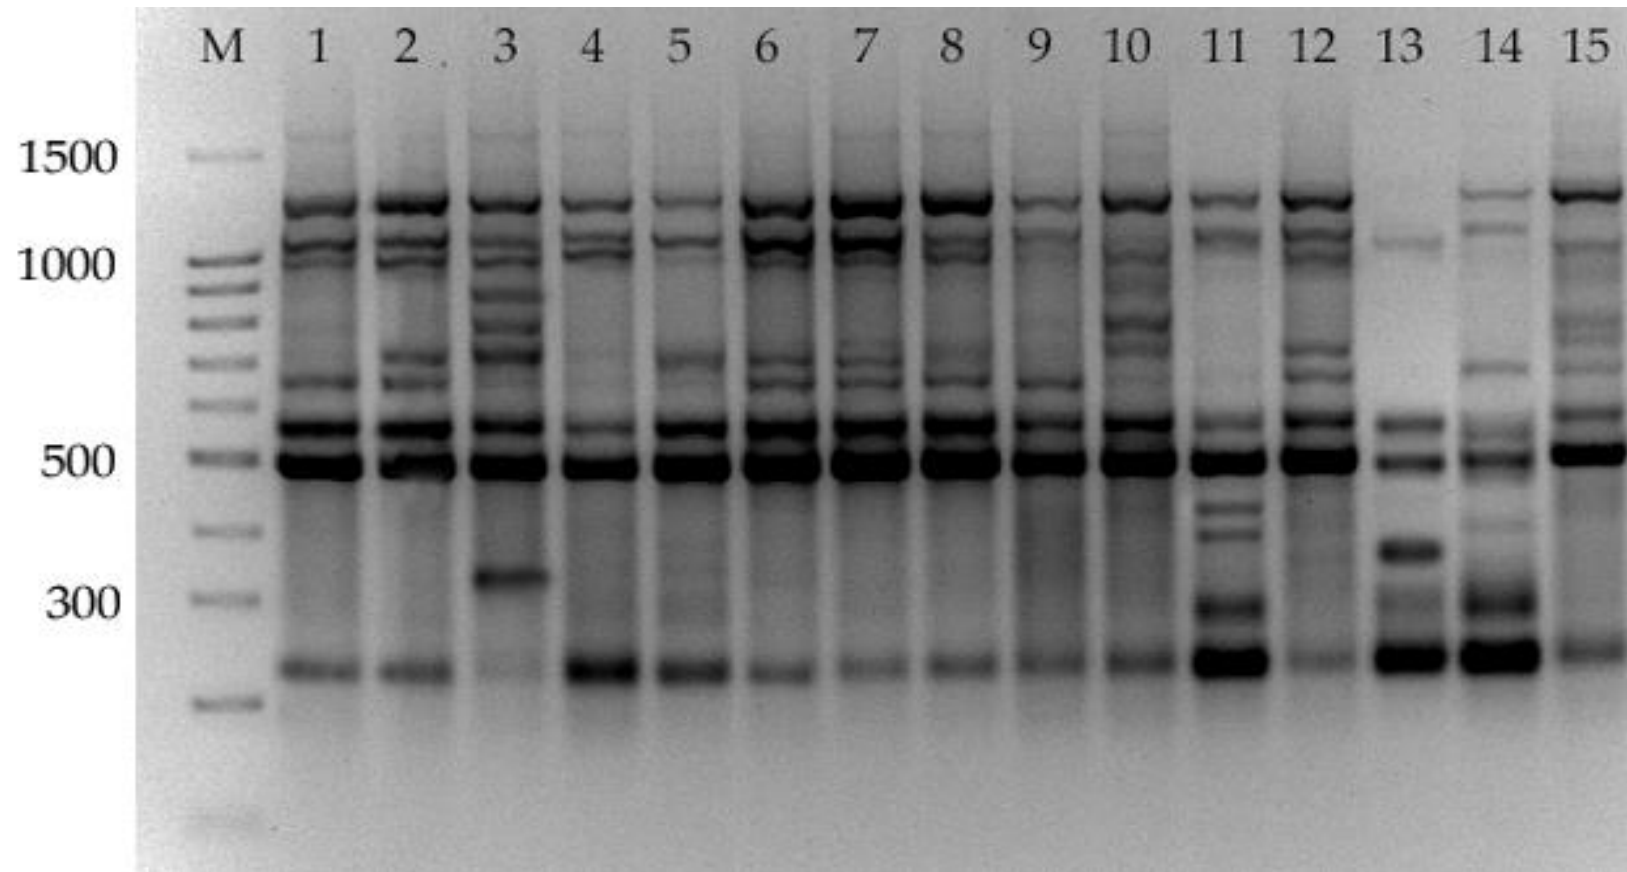

**Figure S23.** The band profiles with ISSR primer X11 (AGC)<sub>6</sub>G for the samples of *P. sibirica* from the population of Krasnovishersk's forestry (PSB\_KV). The numbers on the top indicate the sample numbers (1-15). Size marker (M): 100 bp DNA Ladder, marked on the left in bp (300 bp to 1500 bp).

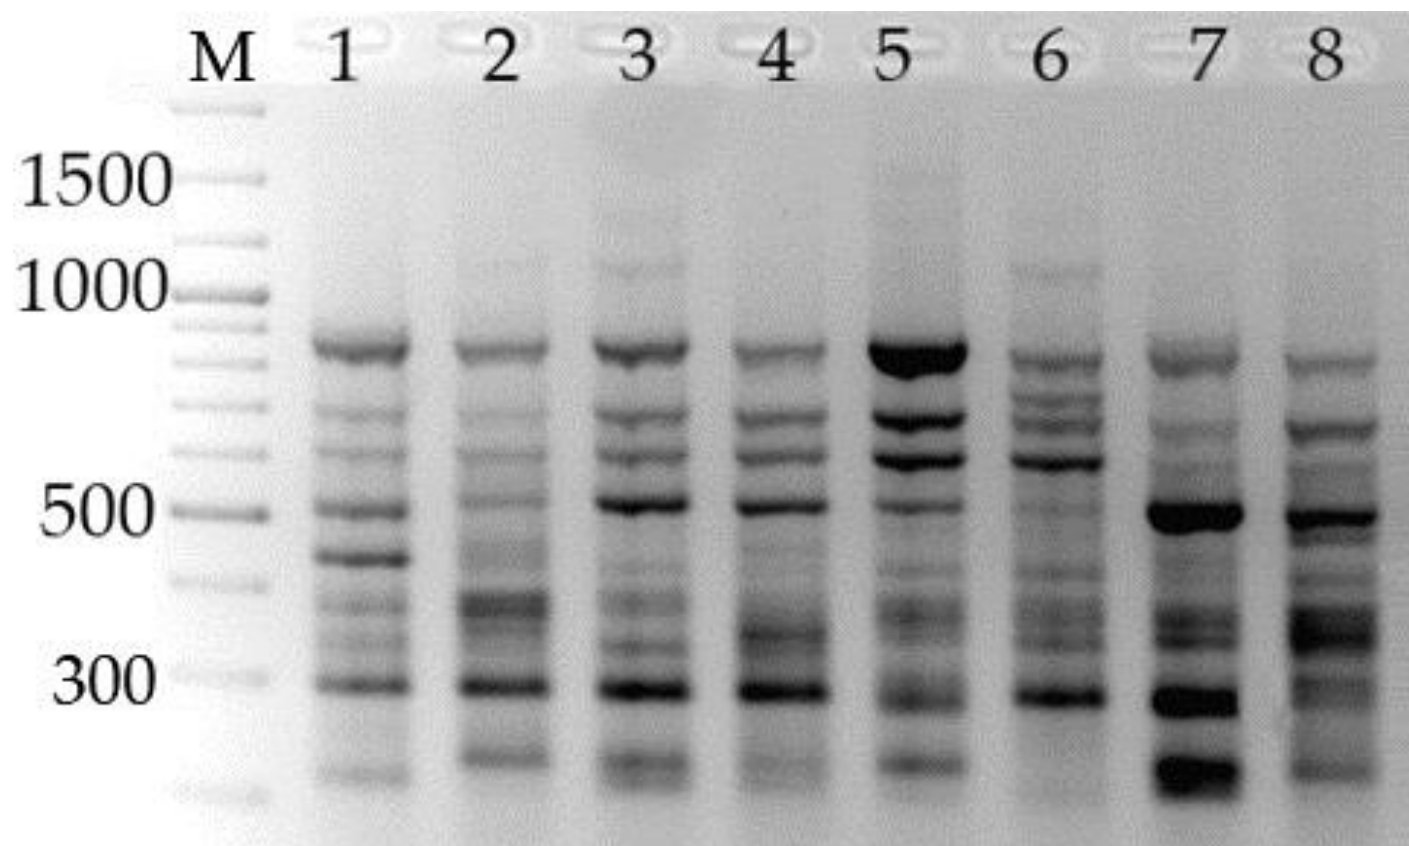

**Figure S24.** The band profiles with ISSR primer ISSR-1 ((AC)<sub>8</sub>T)) for the samples of *P. sylvestris* from the population of Perm's forestry (*Ps\_Uk*). The numbers on the top indicate the sample numbers (1-8). Size marker (M): 100 bp DNA Ladder, marked on the left in bp (300 bp to 1500 bp).

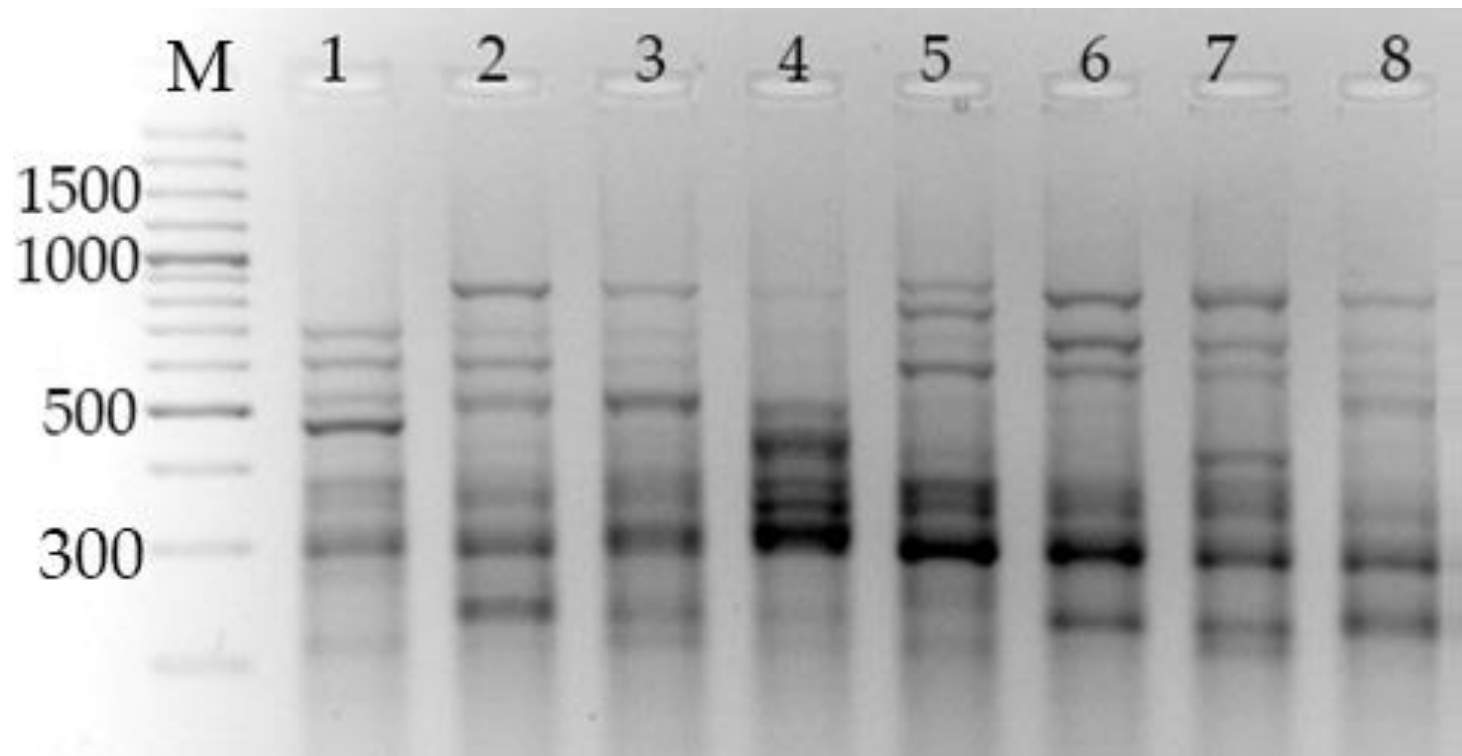

**Figure S25.** The band profiles with ISSR primer ISSR-1 ((AC)<sub>8</sub>T) for the samples of *P. sylvestris* from the population of Gainy's forestry (*Ps\_Gn*). The numbers on the top indicate the sample numbers (1-8). Size marker (M): 100 bp DNA Ladder, marked on the left in bp (300 bp to 1500 bp).



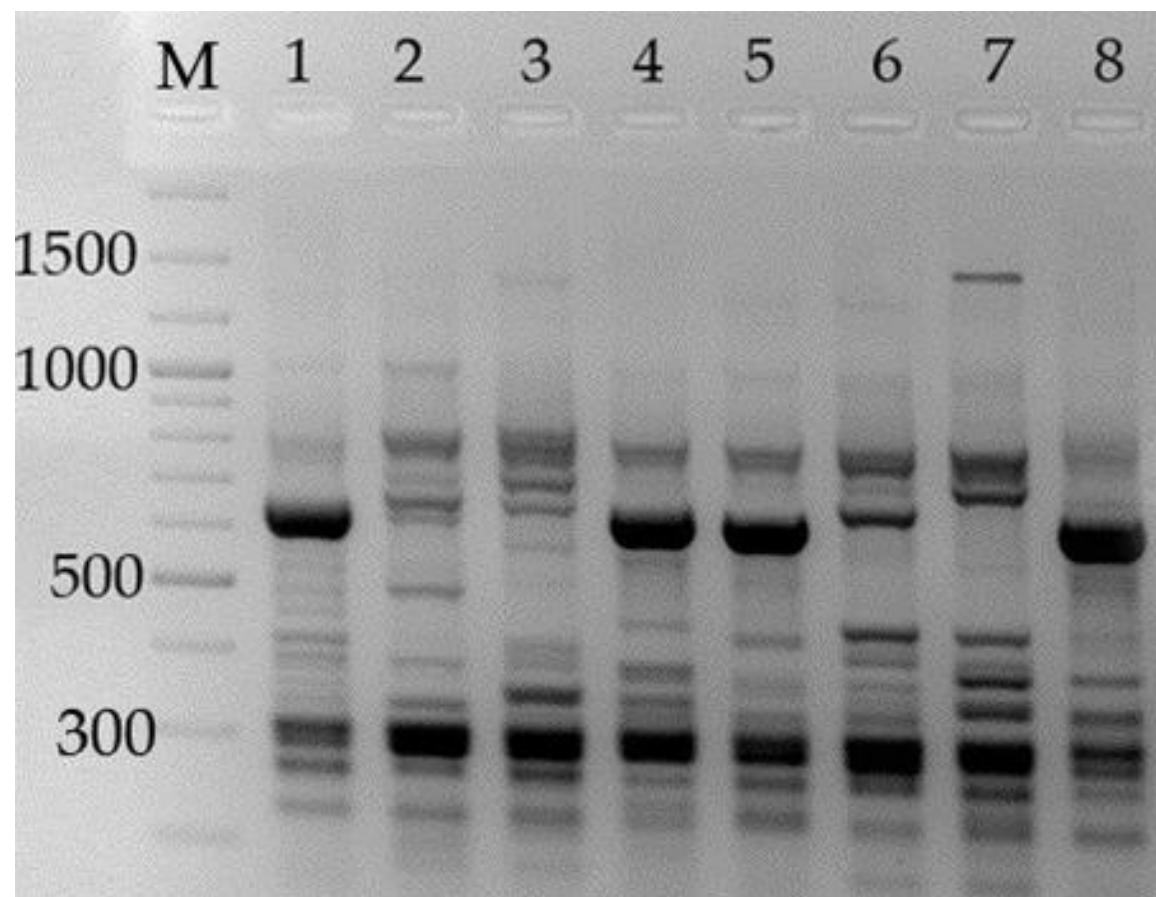

**Figure S26.** The band profiles with ISSR primer X10 ((AGC)<sub>6</sub>C) for the samples of *P. sylvestris* from the population of Karagay's forestry (*Ps\_Kg*). The numbers on the top indicate the sample numbers (1-8). Size marker (M): 100 bp DNA Ladder, marked on the left in bp (300 bp to 1500 bp).

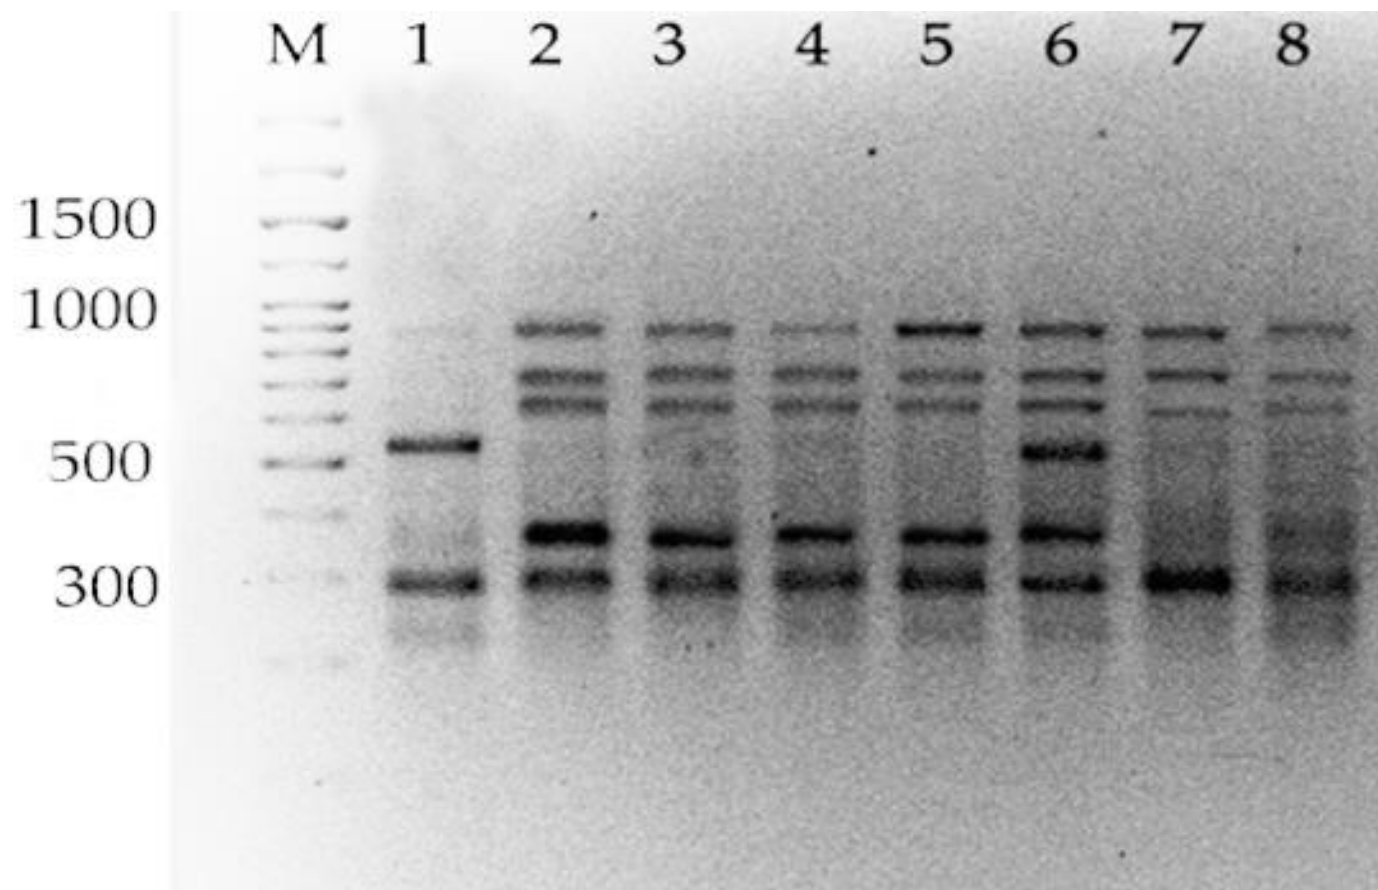

**Figure S27.** The band profiles with ISSR primer ISSR-1 ((AC)<sub>8</sub>T) for the samples of *P. sylvestris* from the population of Verkhoturye's forestry (*PS\_KN*). The numbers on the top indicate the sample numbers (1-8). Size marker (M): Step100 Long, marked on the left in bp (300 bp to 1500 bp).

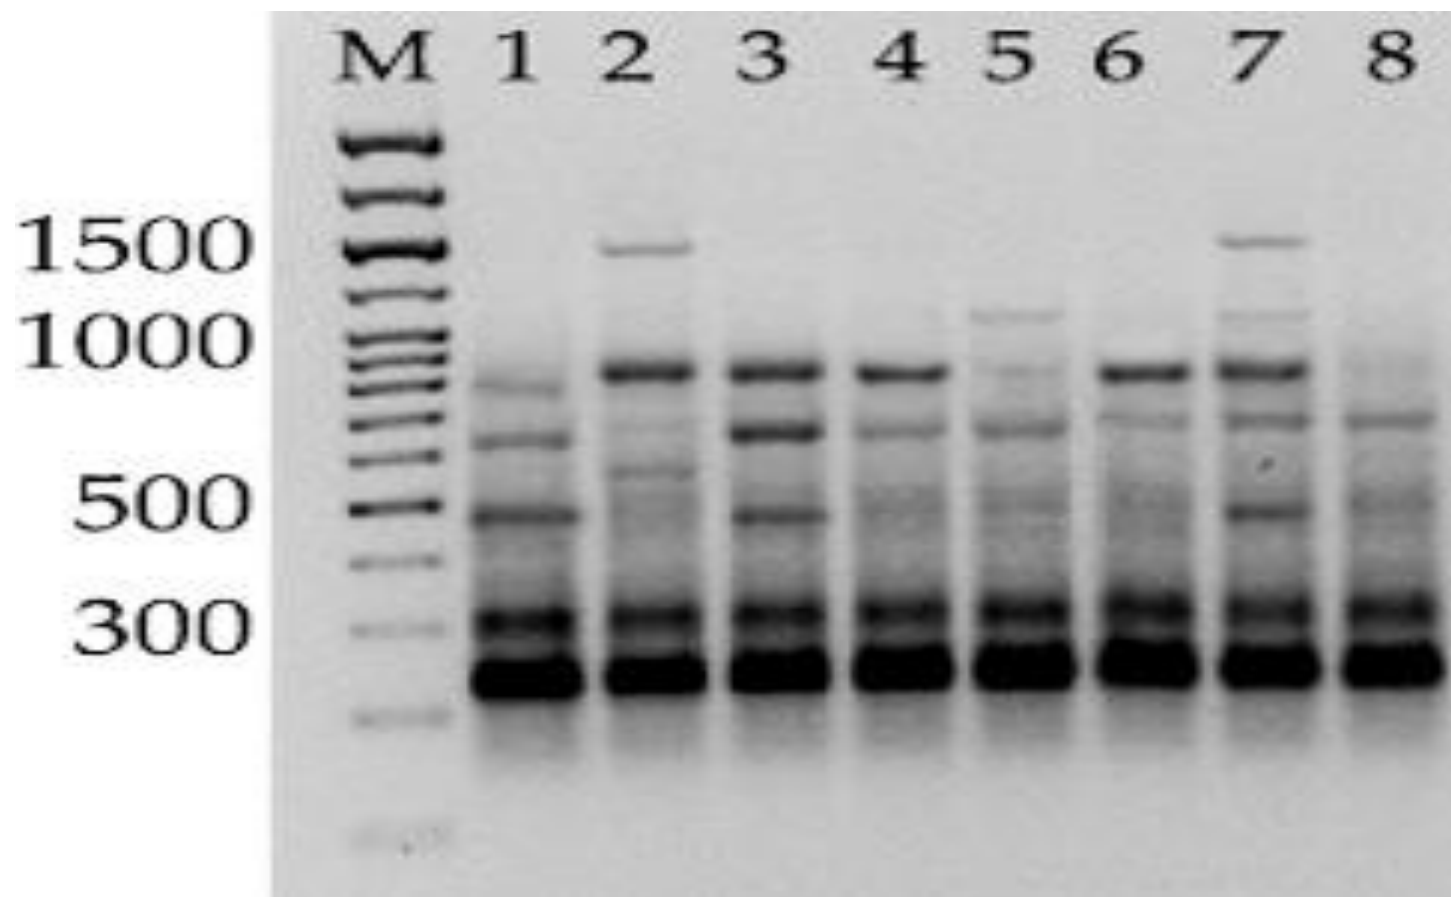

**Figure S28.** The band profiles with ISSR primer X10 ((AGC)<sub>6</sub>C) for the samples of *P. sylvestris* from the population of Vishnyovogorsk's forestry (*PS\_AR*). The numbers on the top indicate the sample numbers (1-8). Size marker (M): Step100 Long, marked on the left in bp (300 bp to 1500 bp).
